# Supplementary material
Source: PubMed Central journal article supplement (PMC7688214)
Supplement: AEM.01981-20-s0001.pdf [file AEM.01981-20-s0001.pdf]

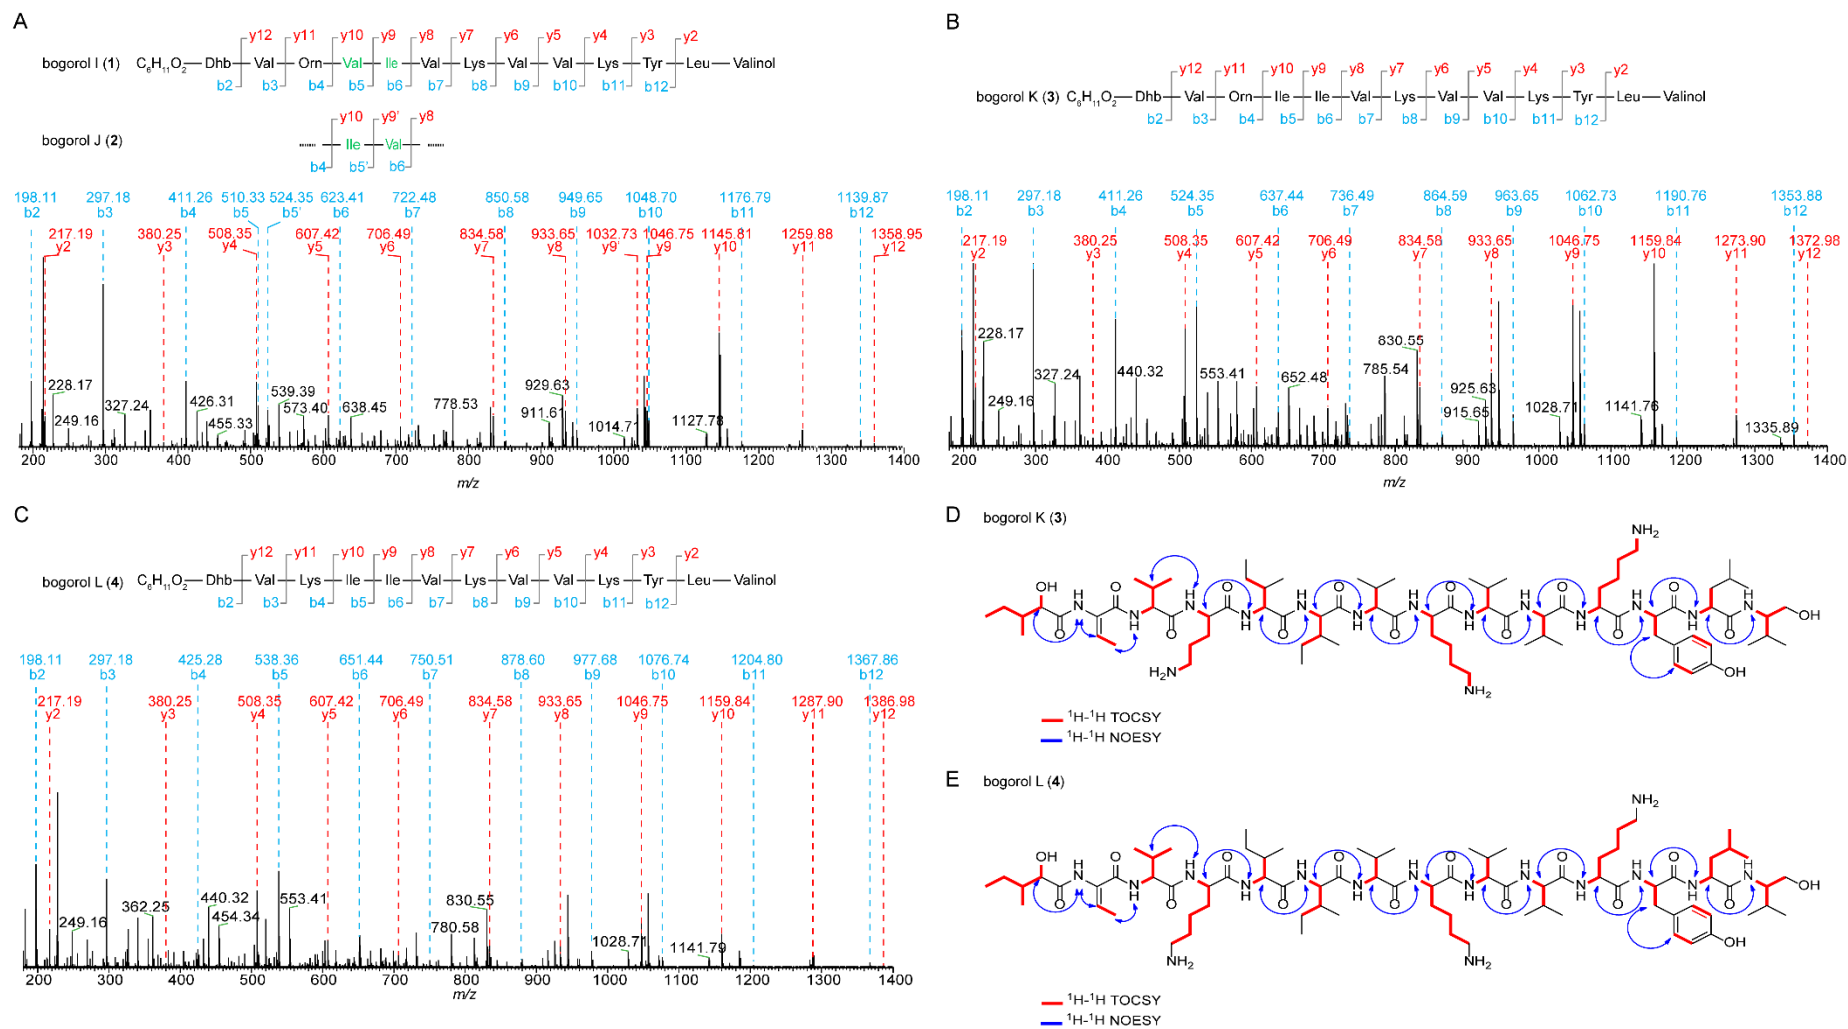

Fig. S1. LC-MS/MS and NMR analysis of bogorol I-L(1-4). Fragmentation of bogorol I and J (A), bogorol K (B), and bogorol L (C) by tandem MS to generate *b* and *y* ions. The *b* ions were indicated in blue, while the *y* ions were indicated in red. The different amino acids of bogorol I and bogorol J are indicated in green.  $^1H$ - $^1H$  TOCSY and  $^1H$ - $^1H$  NOESY NMR correlations of bogorol K (D) and bogorol L (E).

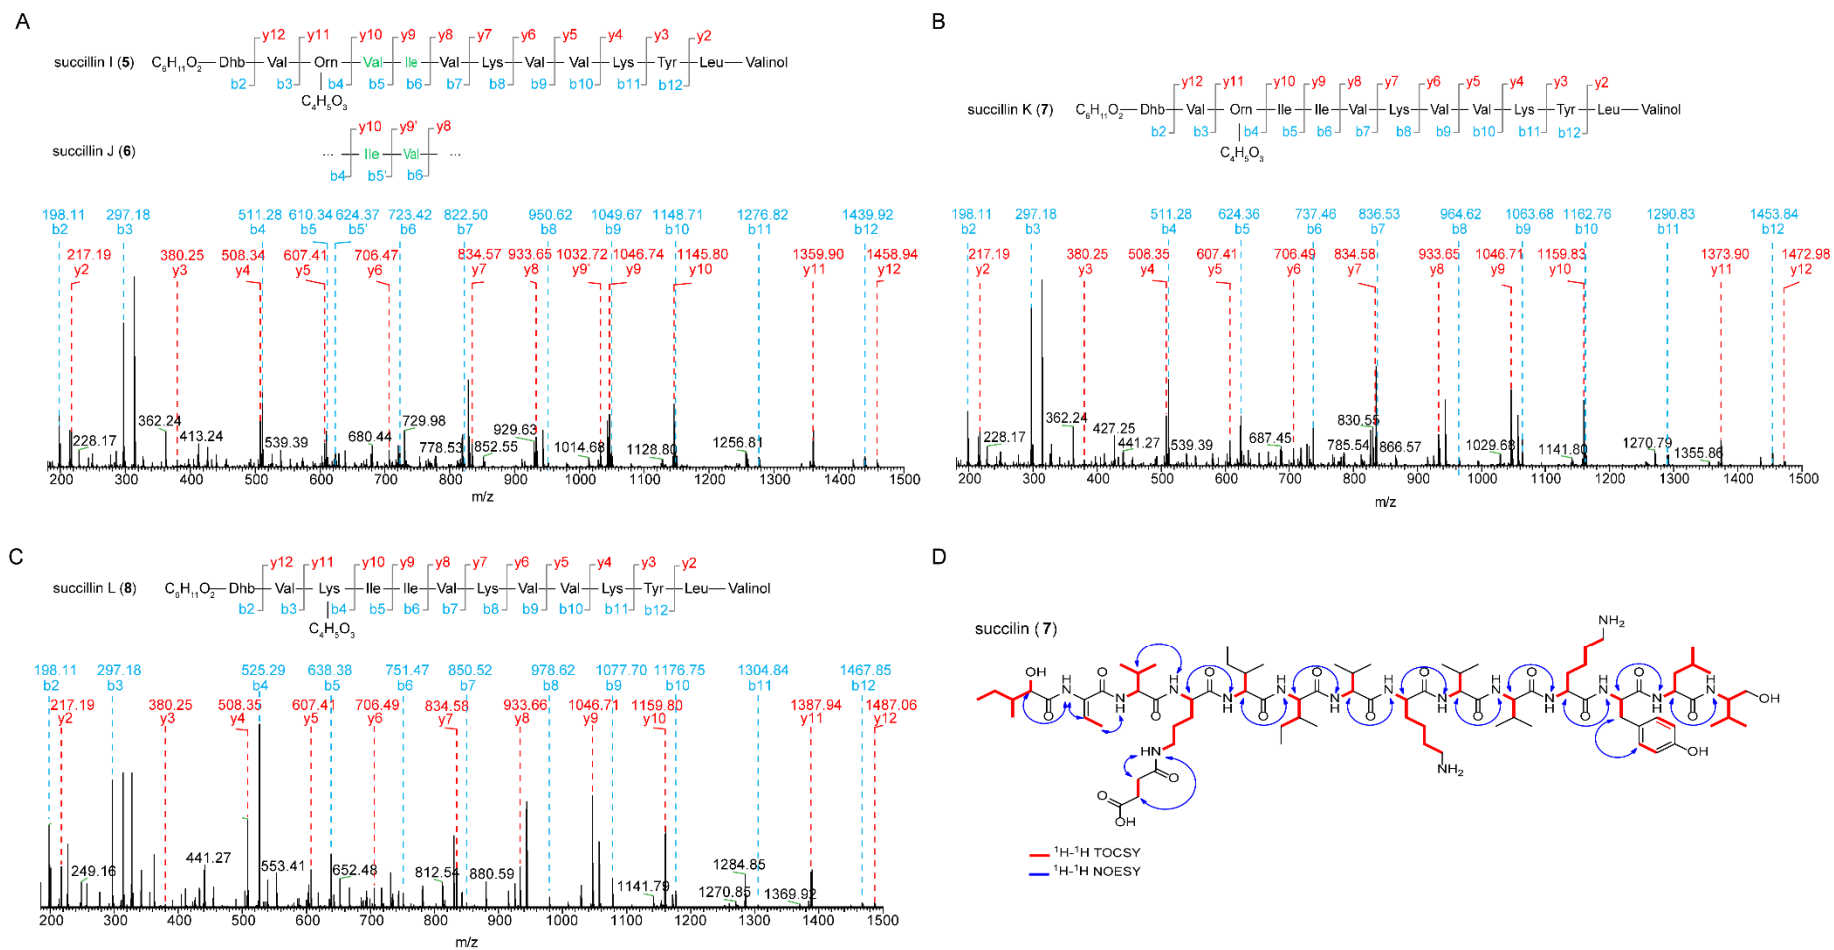

Fig. S2. LC-MS/MS and NMR analysis of succillin I-L(5-8). Fragmentation of succillin I and J (A), succillin K (B), and succillin L (C) by tandem MS to generate *b* and *y* ions. The *b* ions were indicated in blue, while the *y* ions were indicated in red. The different amino acids of succillin I and succillin J are indicated in green.  $^1H$ - $^1H$  TOCSY and  $^1H$ - $^1H$  NOESY NMR correlations of succillin K (D)

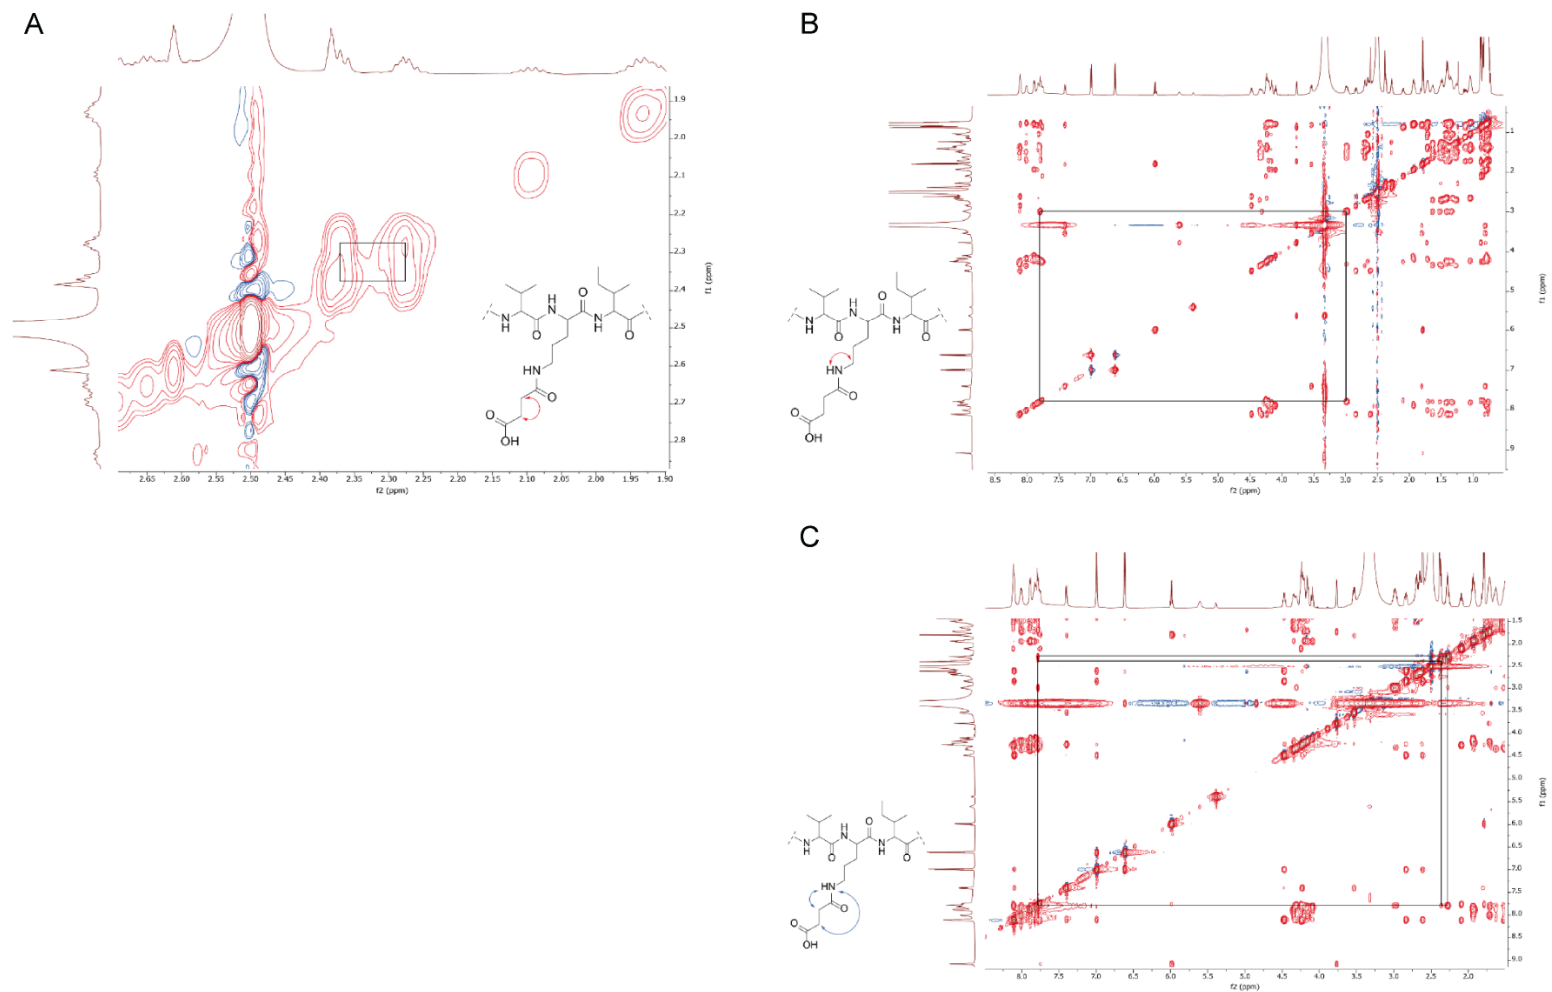

Fig. S3. NMR analysis of succilin K (**7**) to verify the succinylation. (A)  $^1\text{H}$ - $^1\text{H}$ -TOCSY NMR correlation of the delta methylene of Orn<sub>3</sub> with the amide NH of the succinyl group of succilin K. (B)  $^1\text{H}$ - $^1\text{H}$ -TOCSY NMR correlation of the delta methylene of Orn<sub>3</sub> with the amide NH of the succinyl group of succilin K. (C)  $^1\text{H}$ - $^1\text{H}$ -NOESY NMR correlations of the succinyl methylenes with the amide NH of the succinyl group of succilin K.

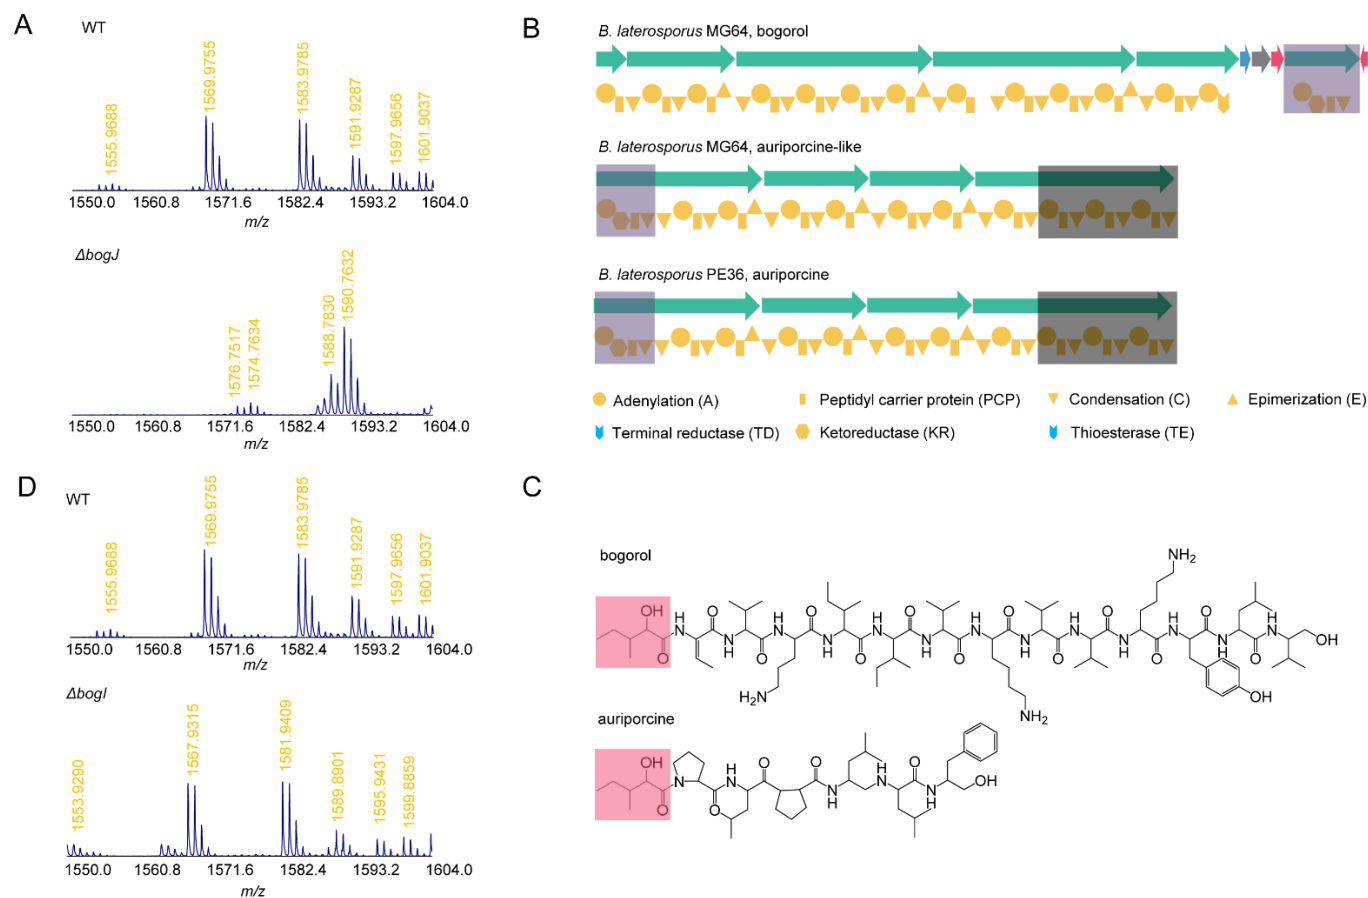

Fig. S4. Investigation of lipoinitiation and valinol formation of bogorols. (A) MALDI-TOF analysis of extracts from wild type (WT) and  $\Delta bogJ$  mutant of *B. laterosporus* LMG15441. The  $[M + H]^+$  of representative compounds are indicated. (B) Biosynthetic gene cluster of bogorol and auriporcine. The modules responsible for fatty acid incorporation are indicated with purple shading. The unfunctional modules in auriporcine BGC are indicated in grey shading. (C) The structures of bogorol and auriporcine. The fatty acids of both compounds are indicated with red shading. (D) MALDI-TOF analysis of extracts from wild type (WT) and  $\Delta bogI$  mutant of *B. laterosporus* LMG15441. The  $[M + H]^+$  of representative compounds were indicated.

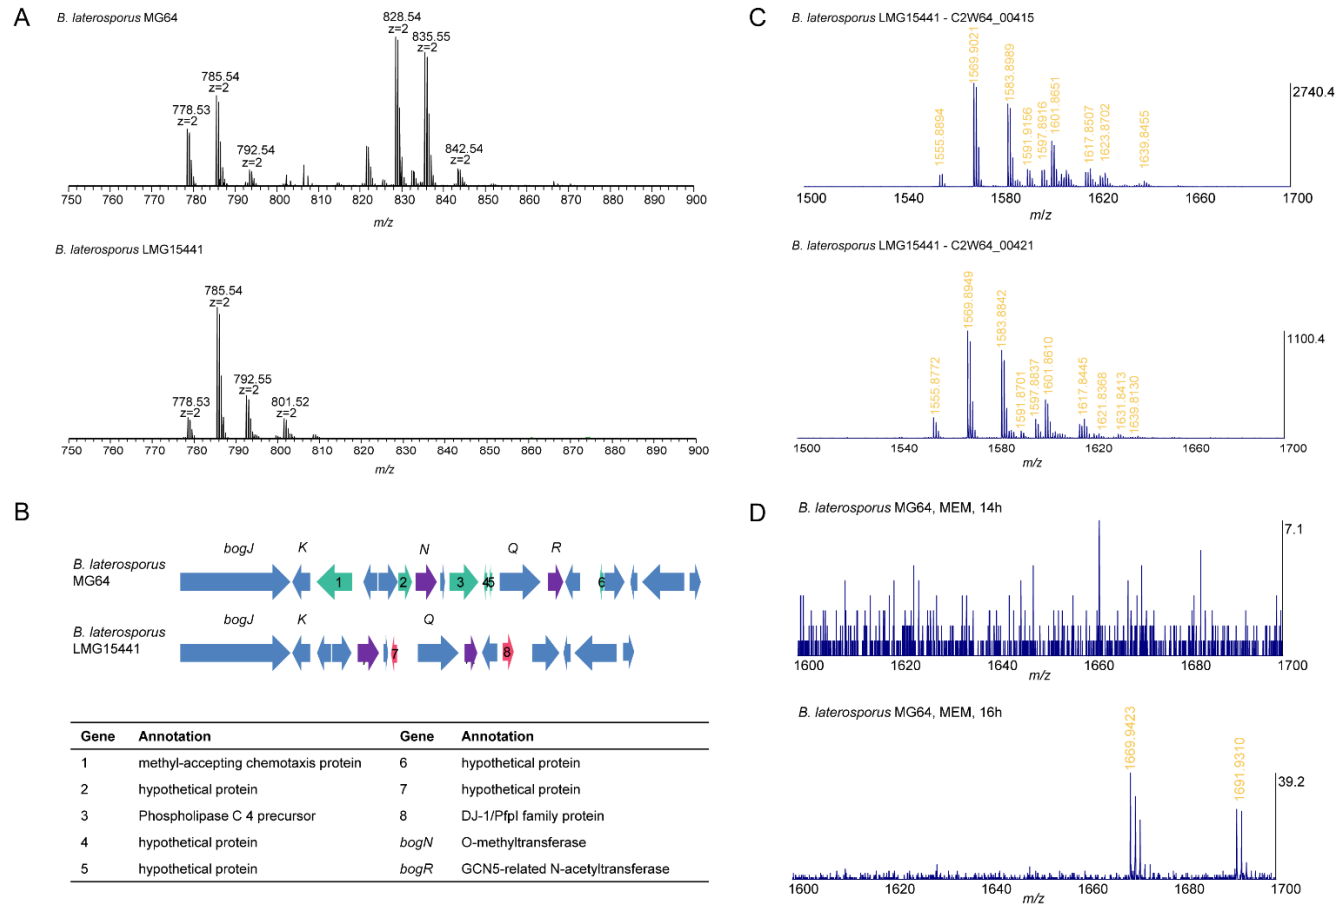

Fig. S5. Investigation of succinylation of succilins. (A) LC-MS of extracts from *B. laterosporus* MG64 and LMG15441.  $z$  in the labels indicate the charges of the ions. (B) Flanking genes of the bogorol BGC in *B. laterosporus* MG64 and LMG15441. Blue, present in both strains; green, only present in *B. laterosporus* MG64; red, only present in *B. laterosporus* LMG15441; purple, transferase. The table presents the annotation of some of the genes. (C) MALDI-TOF analysis of extracts from *B. laterosporus* LMG15441 with heterologous expression of the gene *bogN* (C2W64\_00415, from *B. laterosporus* MG64) and *bogR* (C2W64\_00421, from *B. laterosporus* MG64). (D) MALDI-TOF analysis of extracts from *B. laterosporus* MG64 at different time points. MEM is the medium used in for this experiment.

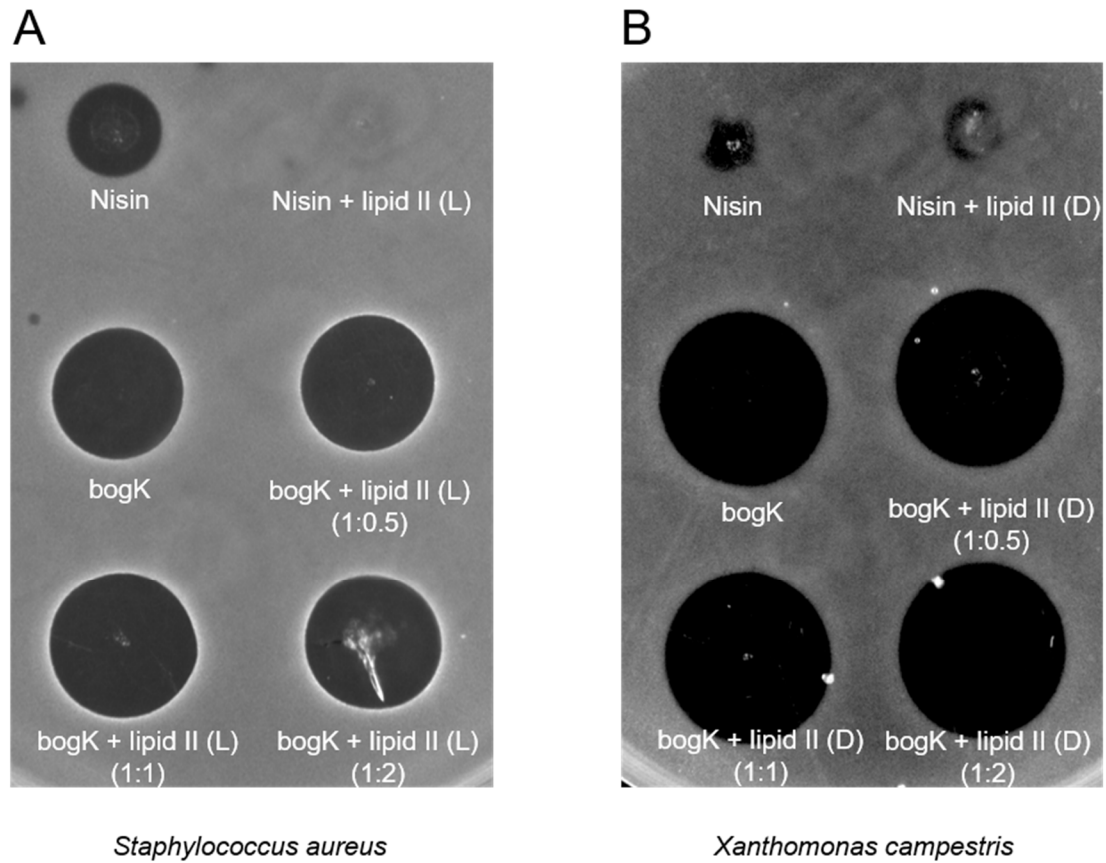

Fig. S6. Investigation of Lipid II binding property of bogorol K. (A) Investigation of bogorol K binding to Gram-positive type Lipid II. *Staphylococcus aureus* is used as an indicator. (B) Investigation of bogorol K binding to Gram-negative type Lipid II. *Xanthomonas campestris* is used as an indicator. Lipid II was mixed with compounds at different ratios before spotting onto the plate, which contains an indicator strain. Nisin was used as a control. L or D in the bracket means a Gram-positive or Gram-negative type of lipid II was used. The plate was incubated at 28 °C overnight before recording the result.

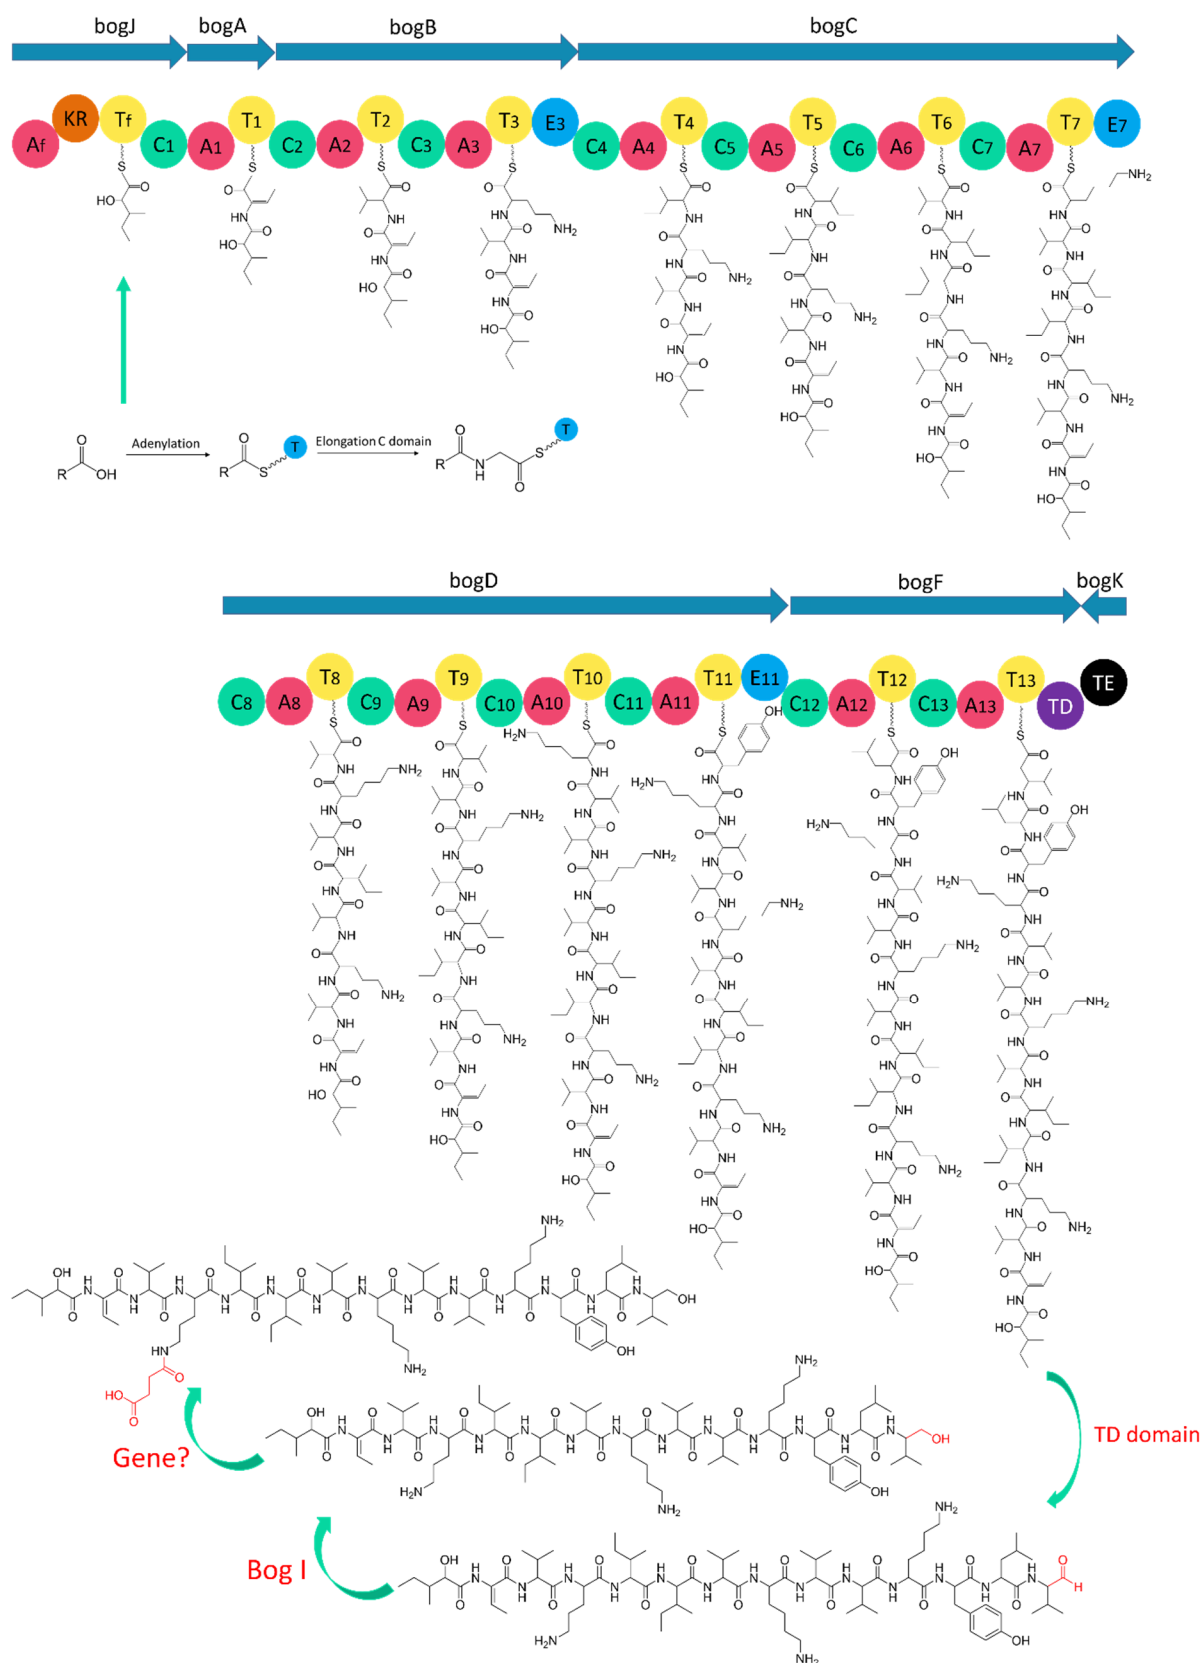

Fig. S7. Summary of the biosynthetic pathway of bogorols and succilins. A, adenylation domain; KR, ketoreductase domain; T, thiolation domain; C, condensation domain; E, epimerization domain; TD, terminal reductase domain; TE, thioesterase domain.

Table S1. Partial chemical shift (ppm) assignments of bogorol K ( $d_6$ -DMSO).

| <b>Residue</b>    | <b>NH</b> | <b><math>^1\text{H}\alpha</math></b> | <b><math>^1\text{H}\beta</math></b>                          | <b>Others</b>                                                                                                               |
|-------------------|-----------|--------------------------------------|--------------------------------------------------------------|-----------------------------------------------------------------------------------------------------------------------------|
| <b>FA</b>         |           | 3.79                                 | $\text{OH}^{\beta 1}$ , 5.61; $\text{CH}^{\beta 2}$ , 1.71   | $\text{CH}_2^{\gamma 1}$ , 1.38/1.12; $\text{CH}_3^{\gamma 2}$ , 0.88; $\text{CH}_3^{\delta 1}$ , 0.80                      |
| <b>Dhb-1</b>      | 9.15      |                                      | 5.93                                                         | $\text{CH}_3^{\gamma 1}$ , 1.78                                                                                             |
| <b>Val-2</b>      | 7.81      | 4.24                                 | 2.11                                                         | $\text{CH}_3^{\gamma}$ , 0.87                                                                                               |
| <b>Orn-3</b>      | 8.08      | 4.42                                 | 1.68                                                         | $\text{CH}_2^{\gamma}$ , 1.55; $\text{CH}_2^{\delta}$ , 2.76; $\text{NH}_2^{\epsilon}$ , 7.63                               |
| <b>Ile-4</b>      | 7.85      | 4.28                                 | 1.70                                                         | $\text{CH}_2^{\gamma 1}$ , 1.35/1.02*                                                                                       |
| <b>Ile-5</b>      | 8.00      | 4.17                                 | 1.69                                                         | $\text{CH}_2^{\gamma 1}$ , 1.43/1.04                                                                                        |
| <b>Val-6</b>      | 7.81      | 4.18                                 | 1.93                                                         |                                                                                                                             |
| <b>Lys-7</b>      | 7.93      | 4.38                                 | 1.63                                                         | $\text{CH}_2^{\gamma}$ , 1.26; $\text{CH}_2^{\delta}$ , 1.48; $\text{CH}_2^{\epsilon}$ , 2.70; $\text{NH}_2^{\zeta}$ , 7.64 |
| <b>Val-8</b>      | 7.86      | 4.22                                 | 1.91                                                         |                                                                                                                             |
| <b>Val-9</b>      | 7.88      | 4.11                                 | 1.94                                                         |                                                                                                                             |
| <b>Lys-10</b>     | 7.78      | 4.24                                 | 1.43/1.32*                                                   | $\text{CH}_2^{\gamma}$ , 1.05; $\text{CH}_2^{\delta}$ , 1.42; $\text{CH}_2^{\epsilon}$ , 2.65; $\text{NH}_2^{\zeta}$ , 7.65 |
| <b>Tyr-11</b>     | 8.09      | 4.47                                 | 2.84/2.60                                                    | $\text{CH}^{\delta}$ , 6.99; $\text{CH}^{\epsilon}$ , 6.62                                                                  |
| <b>Leu-12</b>     | 8.08      | 4.24                                 | 1.38                                                         | $\text{CH}_3^{\delta 1}$ , 0.82; $\text{CH}_3^{\delta 2}$ , 0.76*                                                           |
| <b>Valinol-13</b> | 7.40      | 3.53                                 | $\text{CH}_2^{\beta 1}$ , 3.34; $\text{CH}^{\beta 2}$ , 1.80 | $\text{CH}_3^{\gamma}$ , 0.81                                                                                               |

\*Tentative assignment due to overlap, but in accordance with the literature (1).



Table S2. Partial chemical shift (ppm) assignments of bogorol L (*d*<sub>6</sub>-DMSO).

| Residue           | NH   | <sup>1</sup> H <sub>α</sub> | <sup>1</sup> H <sub>β</sub>                                   | Others                                                                                                                |
|-------------------|------|-----------------------------|---------------------------------------------------------------|-----------------------------------------------------------------------------------------------------------------------|
| <b>FA</b>         |      | 3.79                        | OH <sup>β1</sup> , 5.61*; CH <sup>β2</sup> , 1.72             | CH <sub>2</sub> <sup>γ1</sup> , 1.38/1.13; CH <sub>3</sub> <sup>γ2</sup> , 0.88; CH <sub>3</sub> <sup>δ1</sup> , 0.80 |
| <b>Dhb-1</b>      | 9.11 |                             | 5.97                                                          | CH <sub>3</sub> <sup>γ1</sup> , 1.79                                                                                  |
| <b>Val-2</b>      | 7.79 | 4.24                        | 2.11                                                          | CH <sub>3</sub> <sup>γ</sup> , 0.87                                                                                   |
| <b>Lys-3</b>      | 8.08 | 4.34                        | 1.63/1.55                                                     | CH <sub>2</sub> <sup>γ</sup> , 1.28; CH <sub>2</sub> <sup>δ</sup> , 1.48; CH <sub>2</sub> <sup>ε</sup> , 2.70;        |
| <b>Ile-4</b>      | 7.79 | 4.24                        | 1.70                                                          |                                                                                                                       |
| <b>Ile-5</b>      | 7.99 | 4.17                        | 1.71                                                          | CH <sub>2</sub> <sup>γ1</sup> , 1.41/1.05                                                                             |
| <b>Val-6</b>      | 7.78 | 4.17                        | 1.94                                                          |                                                                                                                       |
| <b>Lys-7</b>      | 7.94 | 4.37                        | 1.63                                                          | CH <sub>2</sub> <sup>γ</sup> , 1.27; CH <sub>2</sub> <sup>δ</sup> , 1.48; CH <sub>2</sub> <sup>ε</sup> , 2.70;        |
| <b>Val-8</b>      | 7.86 | 4.21                        | 1.93                                                          |                                                                                                                       |
| <b>Val-9</b>      | 7.88 | 4.11                        | 1.94                                                          |                                                                                                                       |
| <b>Lys-10</b>     | 7.78 | 4.24                        | 1.42/1.31*                                                    | CH <sub>2</sub> <sup>γ</sup> , 1.05; CH <sub>2</sub> <sup>δ</sup> , 1.42; CH <sub>2</sub> <sup>ε</sup> , 2.65;        |
| <b>Tyr-11</b>     | 8.09 | 4.47                        | 2.84/2.61                                                     | CH <sup>δ</sup> , 6.99; CH <sup>ε</sup> , 6.62                                                                        |
| <b>Leu-12</b>     | 8.09 | 4.24                        | 1.39                                                          | CH <sup>γ</sup> , 1.35*; CH <sub>3</sub> <sup>δ1</sup> , 0.81; CH <sub>3</sub> <sup>δ2</sup> , 0.76                   |
| <b>Valinol-13</b> | 7.40 | 3.54                        | CH <sub>2</sub> <sup>β1</sup> , 3.34; CH <sup>β2</sup> , 1.81 | CH <sub>3</sub> <sup>γ</sup> , 0.81                                                                                   |

\*Tentative assignment due to overlap, but in accordance with the literature (1).

Table S3. Marfey analysis of bogorol K (3) and bogorol L (4).

| <b>Standard</b>  | <b>Retention Time (min.)</b> | <b>bogorol K (3)</b> | <b>bogorol L (4)</b> |
|------------------|------------------------------|----------------------|----------------------|
| L-Val            | 10.30                        | 10.25                | 10.21                |
| D-Val            | 12.05                        | -                    | -                    |
| L-Leu            | 12.06                        | 12.02                | 11.98                |
| D-Leu            | 13.76                        | -                    | -                    |
| L-Ile            | 11.76                        | 11.71                | 11.68                |
| D-Ile            | 13.60                        | -                    | -                    |
| L-Phe (standard) | 11.98                        | 11.93                | 11.89                |
| L-Tyr            | 6.59 / 9.14                  | -                    | -                    |
| D-Tyr            | 6.58 / 9.77                  | 6.44 / 9.69          | 6.41 / 9.65          |
| L-Orn            | 4.55 / 4.91                  | -                    | -                    |
| D-Orn            | 4.04 / 4.89                  | 3.80 / 4.69          | -                    |
| L-Lys            | 5.14 / 5.61                  | 4.84 / 5.39          | 4.85 / 5.38          |
| D-Lys            | 5.12 / 4.78                  | 4.78 / 4.50          | 4.79 / 4.51          |
| L-(S)Vol         | 9.94                         | 9.87                 | 9.84                 |
| D-(R)Vol         | 12.05                        | -                    | -                    |

Table S4. Partial chemical shift (ppm) assignments of succilin K (*d*<sub>6</sub>-DMSO).

| Residue                | NH   | <sup>1</sup> H <sub>α</sub> | <sup>1</sup> H <sub>β</sub>                                   | Others                                                                                                                                                                                    |
|------------------------|------|-----------------------------|---------------------------------------------------------------|-------------------------------------------------------------------------------------------------------------------------------------------------------------------------------------------|
| <b>FA</b>              |      | 3.77                        | OH <sup>β1</sup> , 5.61; CH <sup>β2</sup> , 1.72              | CH <sub>2</sub> <sup>γ1</sup> , 1.37/1.12; CH <sub>3</sub> <sup>γ2</sup> , 0.88; CH <sub>3</sub> <sup>δ1</sup> , 0.79                                                                     |
| <b>Dhb-1</b>           | 9.08 |                             | 5.99                                                          | CH <sub>3</sub> <sup>γ1</sup> , 1.79                                                                                                                                                      |
| <b>Val-2</b>           | 7.76 | 4.25                        | 2.10                                                          | CH <sub>3</sub> <sup>γ</sup> , 0.86                                                                                                                                                       |
| <b>Orn-3<br/>(Suc)</b> | 8.12 | 4.31                        | 1.63/1.52                                                     | CH <sub>2</sub> <sup>γ</sup> , 1.41/1.33; CH <sub>2</sub> <sup>δ</sup> , 2.98; NH <sup>ε</sup> , 7.79;<br><b>CH<sub>2</sub><sup>suc1</sup>, 2.28; CH<sub>2</sub><sup>suc2</sup>, 2.36</b> |
| <b>Ile-4</b>           | 7.78 | 4.21                        | 1.71                                                          |                                                                                                                                                                                           |
| <b>Ile-5</b>           | 8.01 | 4.16                        | 1.72                                                          | CH <sub>2</sub> <sup>γ1</sup> , 1.43/1.05                                                                                                                                                 |
| <b>Val-6</b>           | 7.84 | 4.16                        | 1.94                                                          |                                                                                                                                                                                           |
| <b>Lys-7</b>           | 8.01 | 4.35                        | 1.63                                                          | CH <sub>2</sub> <sup>γ</sup> , 1.27; CH <sub>2</sub> <sup>δ</sup> , 1.48; CH <sub>2</sub> <sup>ε</sup> , 2.70;                                                                            |
| <b>Val-8</b>           | 7.89 | 4.20                        | 1.93                                                          |                                                                                                                                                                                           |
| <b>Val-9</b>           | 7.89 | 4.10                        | 1.94                                                          |                                                                                                                                                                                           |
| <b>Lys-10</b>          | 7.82 | 4.24                        | 1.41/1.32*                                                    | CH <sub>2</sub> <sup>γ</sup> , 1.04; CH <sub>2</sub> <sup>δ</sup> , 1.41; CH <sub>2</sub> <sup>ε</sup> , 2.65;                                                                            |
| <b>Tyr-11</b>          | 8.11 | 4.47                        | 2.84/2.61                                                     | CH <sup>δ</sup> , 6.99; CH <sup>ε</sup> , 6.62                                                                                                                                            |
| <b>Leu-12</b>          | 8.10 | 4.24                        | 1.39                                                          | CH <sup>γ</sup> , 1.35*; CH <sub>3</sub> <sup>δ1</sup> , 0.82; CH <sub>3</sub> <sup>δ2</sup> , 0.76                                                                                       |
| <b>Valinol-13</b>      | 7.40 | 3.53                        | CH <sub>2</sub> <sup>β1</sup> , 3.34; CH <sup>β2</sup> , 1.80 | CH <sub>3</sub> <sup>γ1</sup> , 0.82; CH <sub>3</sub> <sup>γ2</sup> , 0.80                                                                                                                |

\*Tentative assignment due to overlap, but in accordance with the literature (1).

Table S5. Comparison of bogorol and succilin peptides

| Position        | FA                                                            | 1   | 2     | 3     | 4   | 5   | 6   | 7   | 8   | 9   | 10  | 11  | 12  | 13      |
|-----------------|---------------------------------------------------------------|-----|-------|-------|-----|-----|-----|-----|-----|-----|-----|-----|-----|---------|
| Bogorol A       | C <sub>6</sub> H <sub>11</sub> O <sub>2</sub>                 | Dhb | Leu   | Orn   | Ile | Val | Val | Lys | Val | Leu | Lys | Tyr | Leu | Valinol |
| Bogorol B       | C <sub>6</sub> H <sub>11</sub> O <sub>2</sub>                 | Dhb | Val   | Orn   | Ile | Val | Val | Lys | Val | Leu | Lys | Tyr | Leu | Valinol |
| Bogorol C       | C <sub>6</sub> H <sub>11</sub> O <sub>2</sub>                 | Dhb | Val   | Orn   | Val | Val | Val | Lys | Val | Leu | Lys | Tyr | Leu | Valinol |
| Bogorol D       | C <sub>6</sub> H <sub>11</sub> O <sub>2</sub>                 | Dhb | Met   | Orn   | Ile | Val | Val | Lys | Val | Leu | Lys | Tyr | Leu | Valinol |
| Bogorol E       | C <sub>6</sub> H <sub>11</sub> O <sub>2</sub>                 | Dhb | Met-O | Orn   | Ile | Val | Val | Lys | Val | Leu | Lys | Tyr | Leu | Valinol |
| Brevibacillin   | C <sub>6</sub> H <sub>11</sub> O <sub>2</sub>                 | Dhb | Leu   | Orn   | Ile | Ile | Val | Lys | Val | Val | Lys | Tyr | Leu | Valinol |
| Brevibacillin V | C <sub>6</sub> H <sub>11</sub> O <sub>2</sub>                 | Dhb | Leu   | Orn   | Ile | Val | Val | Lys | Val | Val | Lys | Tyr | Leu | Valinol |
| BT peptide      | C <sub>11</sub> H <sub>20</sub> O <sub>2</sub> N <sub>1</sub> | Dhb | Leu   | Orn   | Ile | Val | Val | Lys | Val | Leu | Lys | Tyr | Leu | Valinol |
| Bogorol I (1)   | C <sub>6</sub> H <sub>11</sub> O <sub>2</sub>                 | Dhb | Val   | Orn   | Ile | Val | Val | Lys | Val | Val | Lys | Tyr | Leu | Valinol |
| Bogorol J (2)   | C <sub>6</sub> H <sub>11</sub> O <sub>2</sub>                 | Dhb | Val   | Orn   | Val | Ile | Val | Lys | Val | Val | Lys | Tyr | Leu | Valinol |
| Bogorol K (3)   | C <sub>6</sub> H <sub>11</sub> O <sub>2</sub>                 | Dhb | Val   | Orn   | Ile | Ile | Val | Lys | Val | Val | Lys | Tyr | Leu | Valinol |
| Bogorol L (4)   | C <sub>6</sub> H <sub>11</sub> O <sub>2</sub>                 | Dhb | Val   | Lys   | Ile | Ile | Val | Lys | Val | Val | Lys | Tyr | Leu | Valinol |
| Succilin I (5)  | C <sub>6</sub> H <sub>11</sub> O <sub>2</sub>                 | Dhb | Val   | Orn-S | Ile | Val | Val | Lys | Val | Val | Lys | Tyr | Leu | Valinol |
| Succilin J (6)  | C <sub>6</sub> H <sub>11</sub> O <sub>2</sub>                 | Dhb | Val   | Orn-S | Val | Ile | Val | Lys | Val | Val | Lys | Tyr | Leu | Valinol |
| Succilin K (7)  | C <sub>6</sub> H <sub>11</sub> O <sub>2</sub>                 | Dhb | Val   | Orn-S | Ile | Ile | Val | Lys | Val | Val | Lys | Tyr | Leu | Valinol |
| Succilin L (8)  | C <sub>6</sub> H <sub>11</sub> O <sub>2</sub>                 | Dhb | Val   | Lys-S | Ile | Ile | Val | Lys | Val | Val | Lys | Tyr | Leu | Valinol |

Note: The position number of conserved residues are indicated in black. The newly identified peptides and their closest peptides are indicated in the same background color, and the different residues in the characterized peptides are indicated in red font. FA: fatty acid.

# Original NMR spectra

$^1\text{H}$  NMR of bogorol K (**3**)

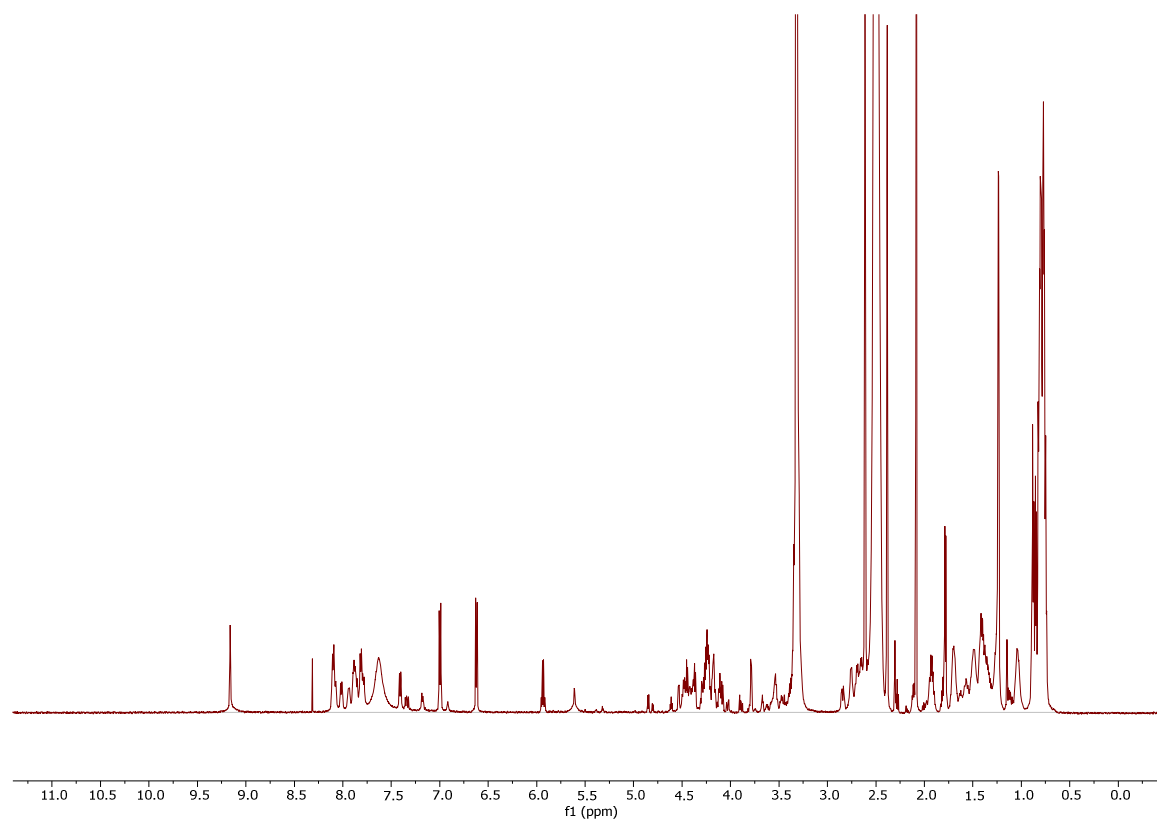

$^1\text{H}$ - $^1\text{H}$ -TOCSY NMR of bogorol K (3)

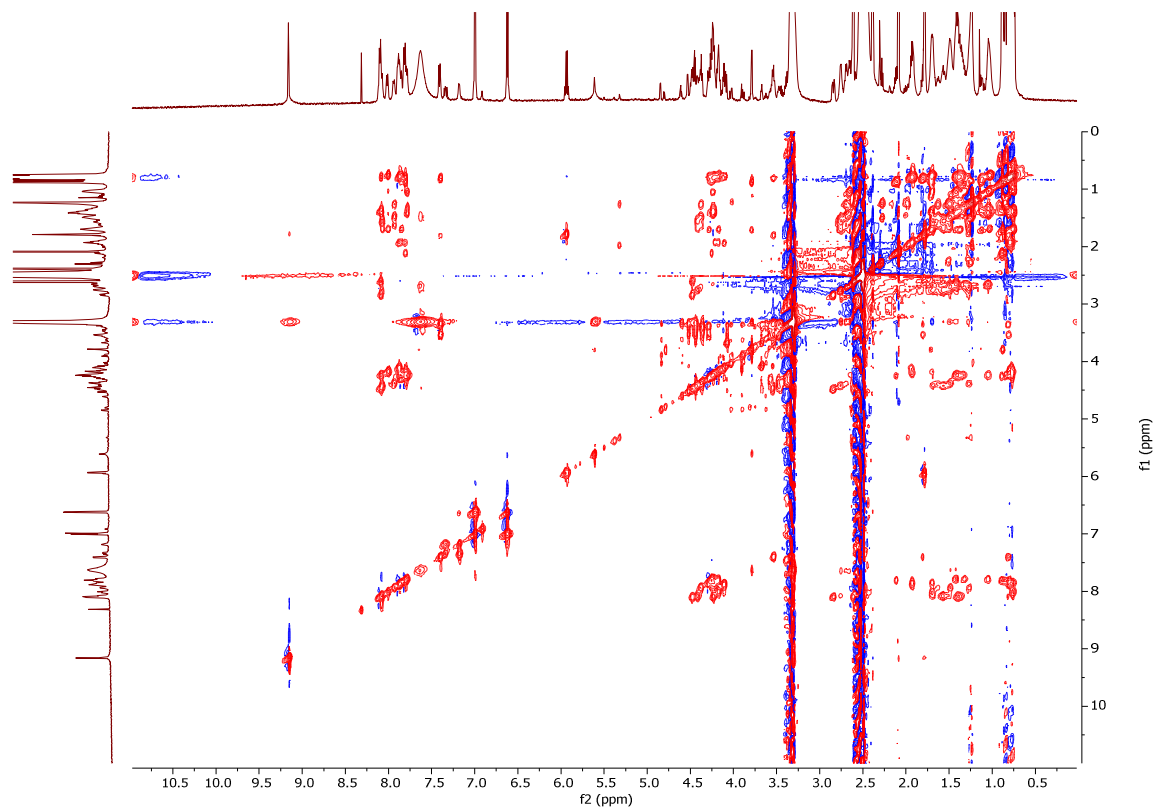

$^1\text{H}$ - $^1\text{H}$ -NOESY NMR of bogorol K (3)

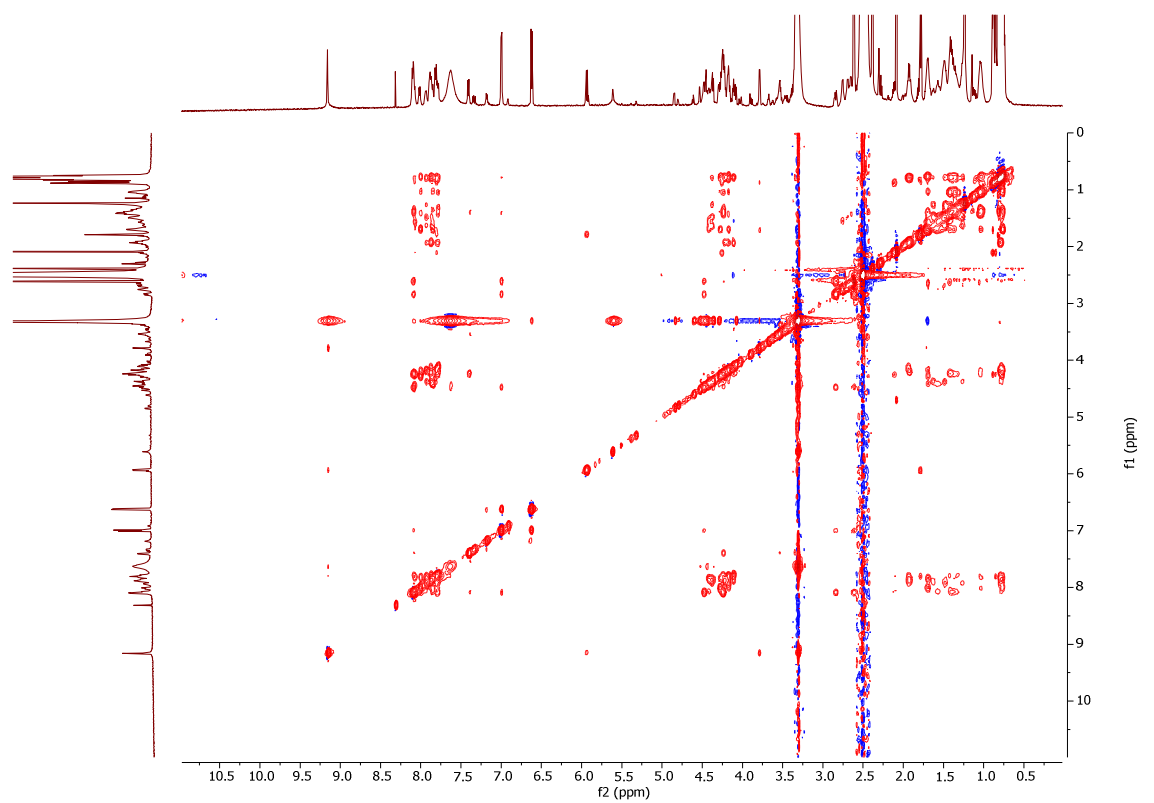

<sup>1</sup>H NMR of bogorol L (4)

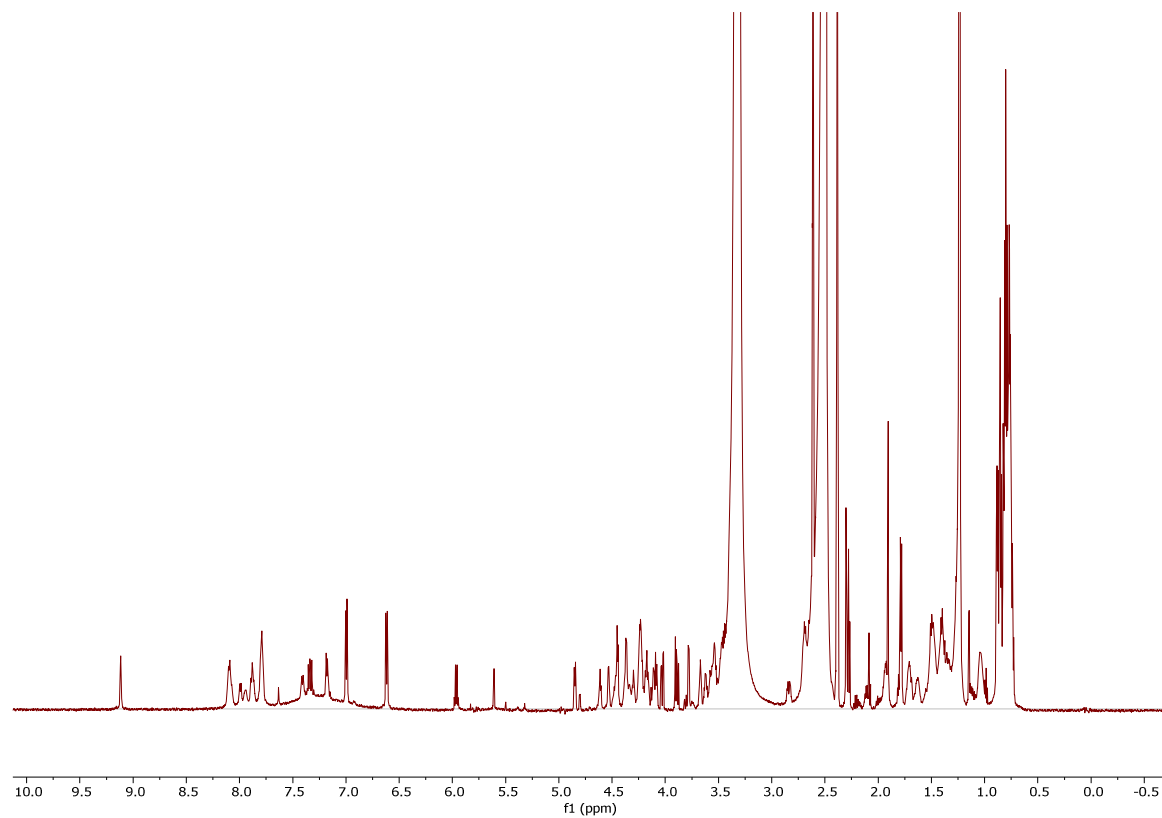

$^1\text{H}$ - $^1\text{H}$ -TOCSY NMR of bogorol L (4)

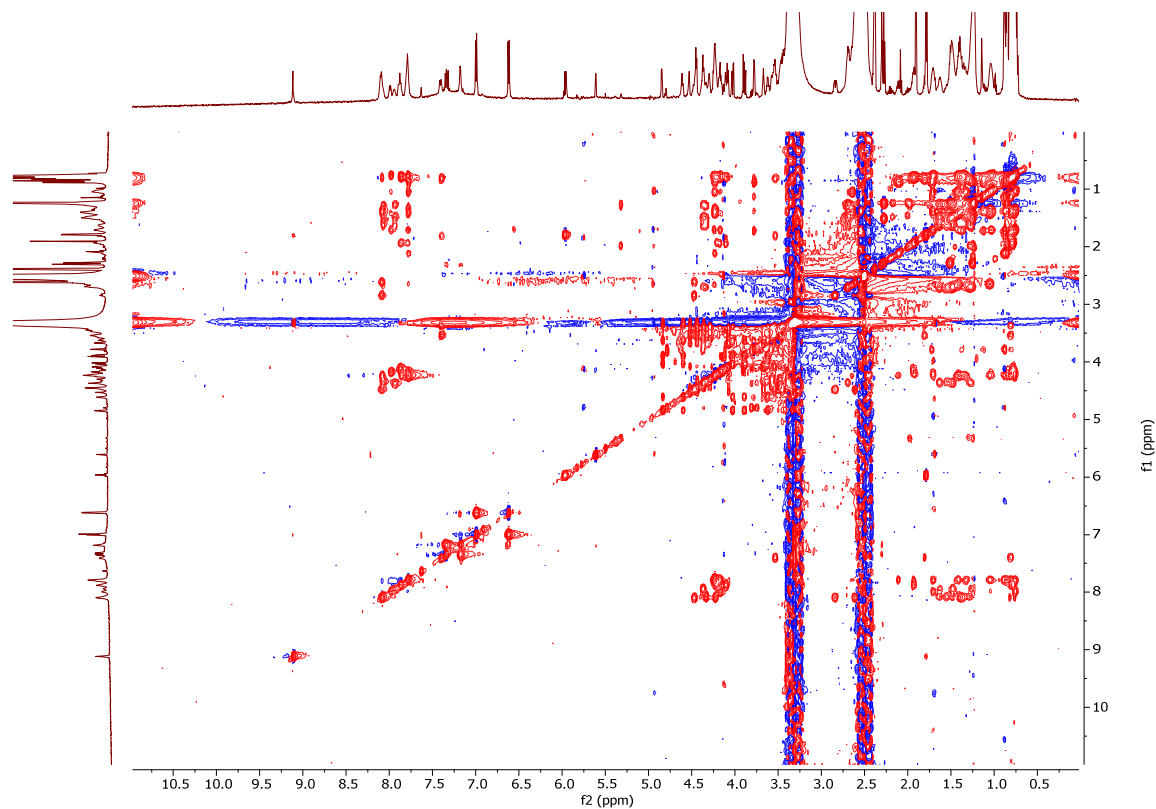

$^1\text{H}$ - $^1\text{H}$ -NOESY NMR of bogorol L (4)

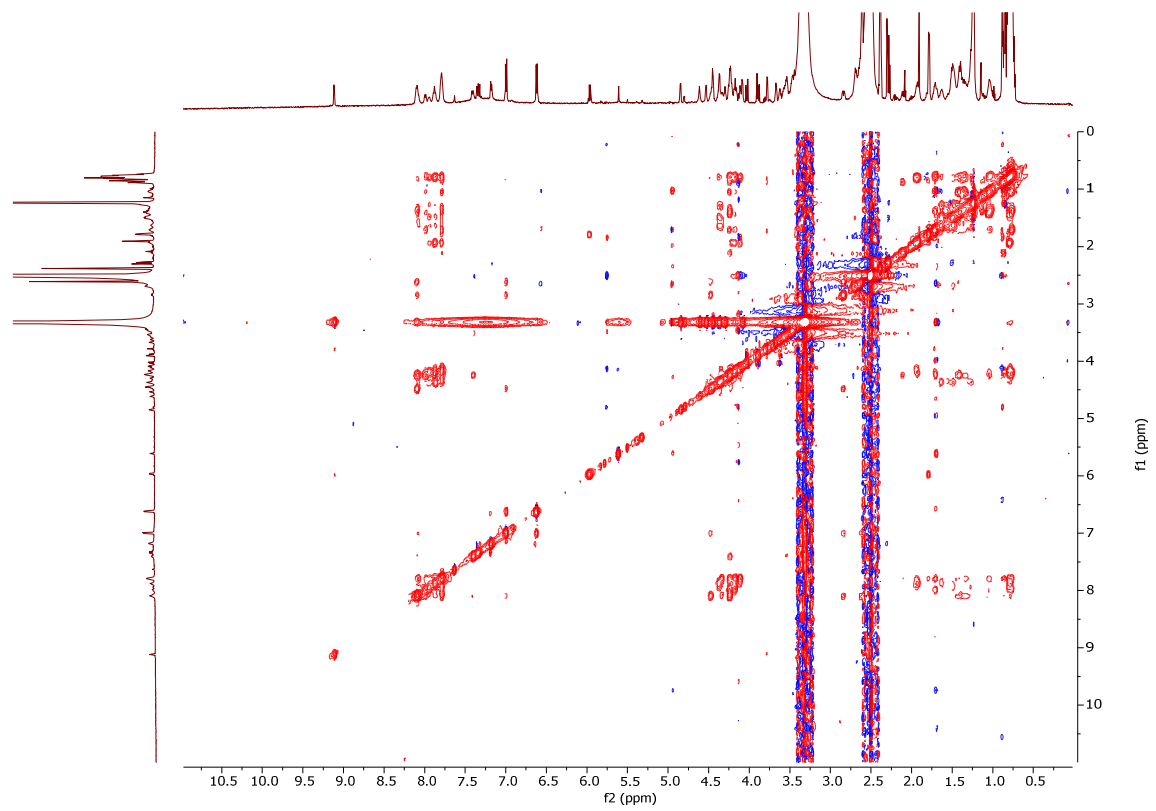



<sup>1</sup>H NMR of succilin K (7)

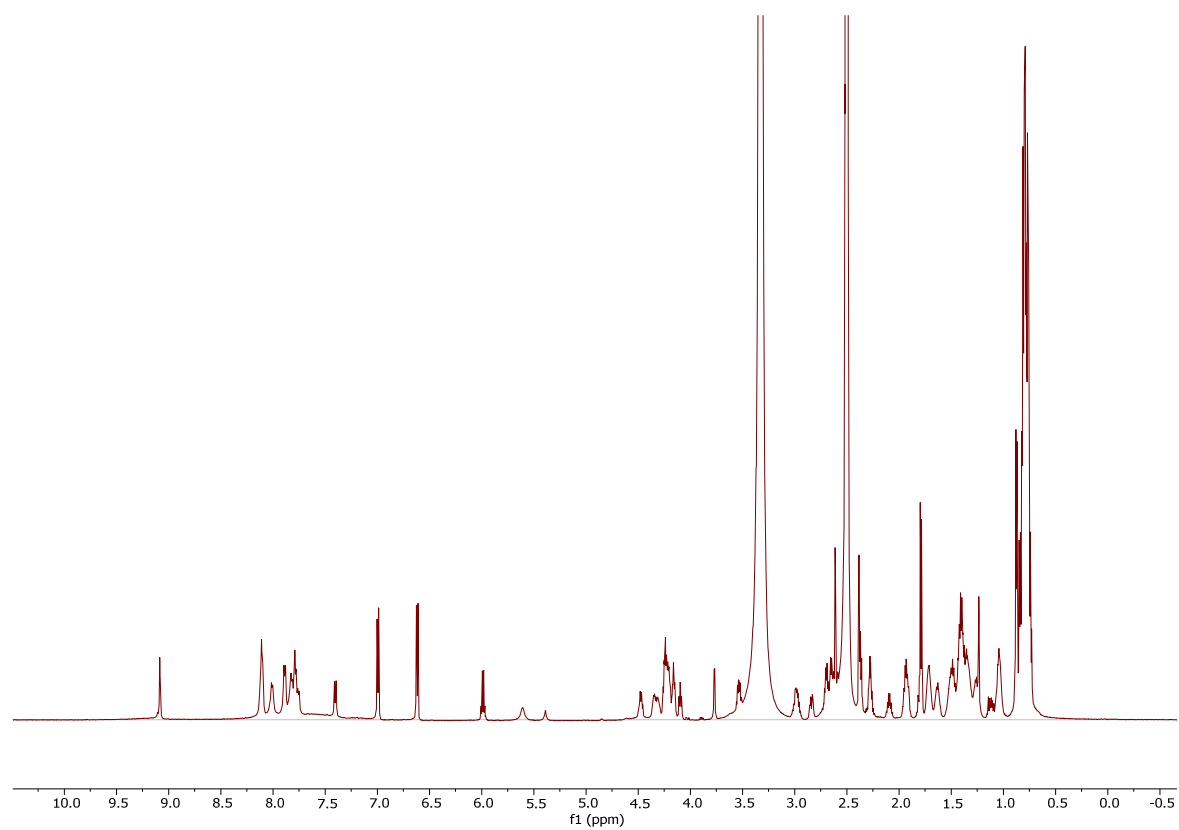

$^1\text{H}$ - $^1\text{H}$ -TOCSY NMR of succilin K (7)

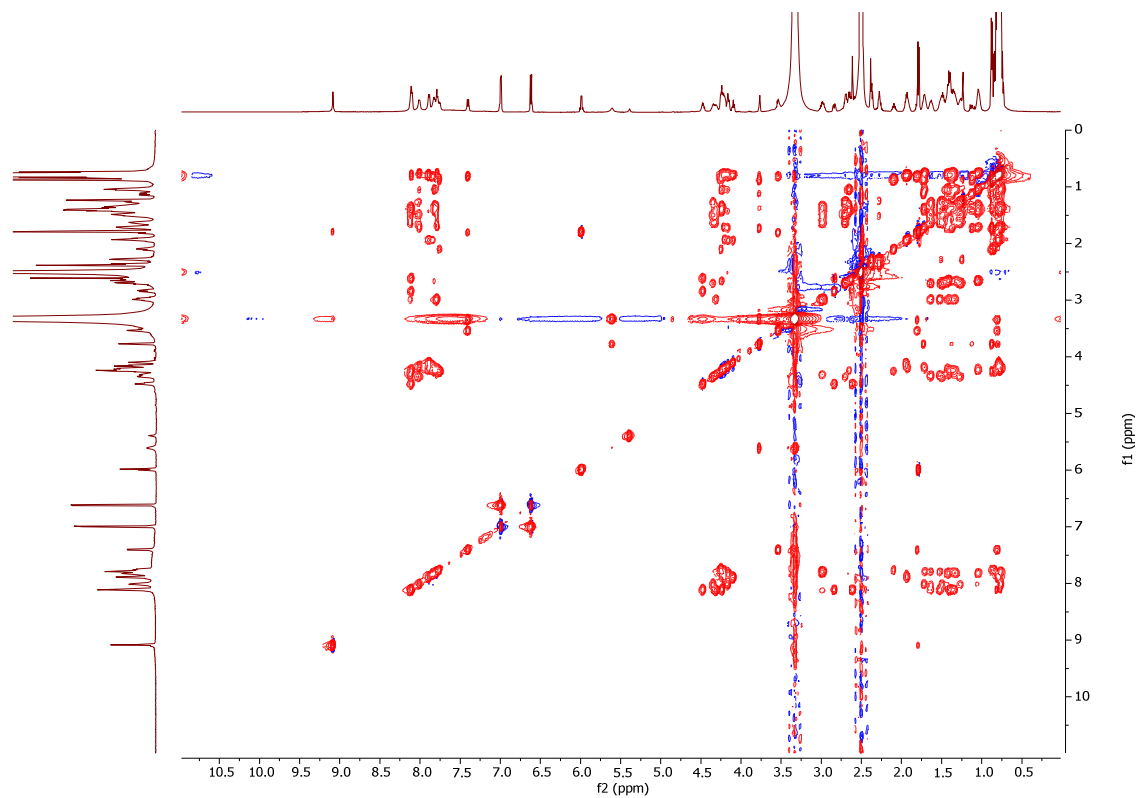

$^1\text{H}$ - $^1\text{H}$ -NOESY NMR of succilin K (7)

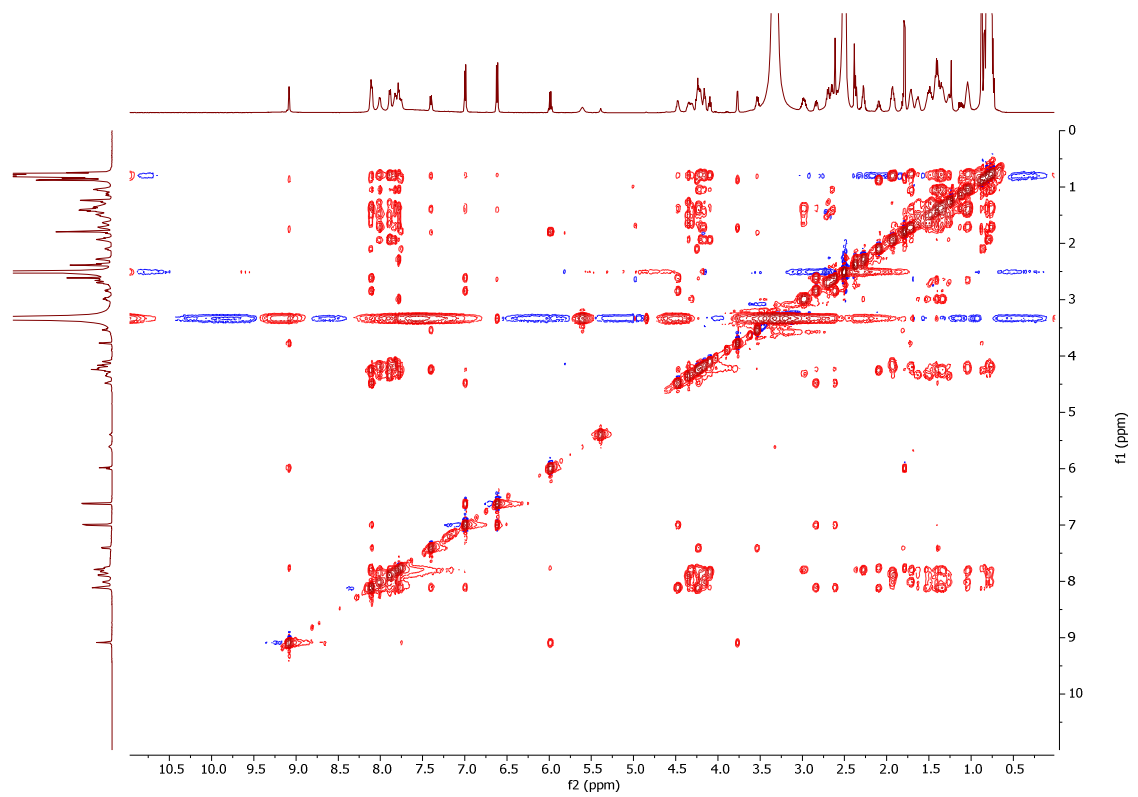

## Reference

1. **Yang X, Huang E, Yuan C, Zhang L, Yousef AE.** 2016. Isolation and structural elucidation of brevibacillin, an antimicrobial lipopeptide from *Brevibacillus laterosporus* that combats drug-resistant Gram-positive bacteria. *Appl Environ Microbiol* **82**:2763-2772.
